# Supplementary material for: Epstein-Barr virus is present in the brain of most cases of multiple sclerosis and may engage more than just B cells
Source: PubMed Central journal article supplement (PMC5796799; doi:10.1371/journal.pone.0192109), 2018-02-02
Supplement: pone.0192109.s001.pdf [file pone.0192109.s001.pdf]

**S1 Table. Summary of demographics of non-MS control cases.** Age at death in years; expressed as mean± standard deviation, with median value in brackets.

| <b>Control cases</b> | <b>N° of cases</b> | <b>Mean age at death</b> |
|----------------------|--------------------|--------------------------|
| <b>Males</b>         | 15                 | 51±27 (55)               |
| <b>Females</b>       | 5                  | 51±11 (52)               |
| <b>Total</b>         | 21                 | 51±24 (55)               |
