# Supplementary material for: Epstein-Barr virus is present in the brain of most cases of multiple sclerosis and may engage more than just B cells
Source: PubMed Central journal article supplement (PMC5796799; doi:10.1371/journal.pone.0192109), 2018-02-02
Supplement: pone.0192109.s002.pdf [file pone.0192109.s002.pdf]

**S2 Table. Summary of clinical characteristics of MS cases.** Age at death, age at disease onset, and duration of disease in years; expressed as means  $\pm$  standard deviation, with the median value in brackets.

| <b>MS cases</b> | <b>N° of cases</b> | <b>Mean age at death</b> | <b>Mean age at MS onset</b> | <b>Mean duration of MS</b> |
|-----------------|--------------------|--------------------------|-----------------------------|----------------------------|
| <b>Males</b>    | 33                 | 60 $\pm$ 13 (59)         | 30 $\pm$ 12 (35)            | 18 $\pm$ 9 (17)            |
| <b>Females</b>  | 68                 | 65 $\pm$ 13 (66)         | 32 $\pm$ 13 (29)            | 27 $\pm$ 16 (21)           |
| <b>Total</b>    | 101                | 63 $\pm$ 13 (64)         | 34 $\pm$ 12 (32)            | 24 $\pm$ 15 (20)           |
