# Supplementary material for: Epstein-Barr virus is present in the brain of most cases of multiple sclerosis and may engage more than just B cells
Source: PubMed Central journal article supplement (PMC5796799; doi:10.1371/journal.pone.0192109), 2018-02-02
Supplement: pone.0192109.s003.pdf [file pone.0192109.s003.pdf]

**S3 Table. Clinical and autopsy data of 101 MS (MS) and 21 control cases (Ctrl).** Age is in years, unless otherwise stated in the table. F: Female, M: Male, MI: Myocardial infarction, AD: Alzheimer's disease, GI: gastrointestinal, FHF: Fulminant hepatic failure, HSV: Herpes simplex virus, DIC: Disseminated intravascular coagulation, SPMS: secondary progressive multiple sclerosis, RRMS: relapsing-remitting multiple sclerosis, PE: pulmonary embolism, PPMS: primary progressive multiple sclerosis.

| Case   | Age     | Sex | Cause of death (COD)/ remarks                                                                                                        |
|--------|---------|-----|--------------------------------------------------------------------------------------------------------------------------------------|
| Ctrl1  | 55      | F   | Extensive end-stage long-standing interstitial lung disease                                                                          |
| Ctrl2  | 25 wk   | M   | Immature lung development                                                                                                            |
| Ctrl3  | 50      | M   | Multifactorial: severe interstitial lung disease with honeycombing, cor pulmonale, MI                                                |
| Ctrl4  | 37.5 wk | M   | Stillborn infant: Intrauterine foetal death due to placental infarction. Neuro-histopathology revealed upon postmortem investigation |
| Ctrl5  | 73      | M   | Acute bronchopneumonia                                                                                                               |
| Ctrl6  | 55      | M   | Alcohol induced cirrhosis                                                                                                            |
| Ctrl7  | N/A     | M   | Dementia with AD                                                                                                                     |
| Ctrl8  | N/A     | M   | Acute MI                                                                                                                             |
| Ctrl9  | N/A     | M   | MI with emphysema                                                                                                                    |
| Ctrl10 | N/A     | F   | Nodular sclerosing Hodgkin's                                                                                                         |
| Ctrl11 | N/A     | M   | Progressive dementia with AD                                                                                                         |
| Ctrl12 | 69      | M   | Respiratory distress due to acute bilateral pneumonia                                                                                |
| Ctrl13 | 38      | F   | Massive GI haemorrhage secondary to idiopathic FHF. Neuro-histopathology revealed upon postmortem investigation                      |
| Ctrl14 | 42      | M   | FHF with HSV hepatitis & haemorrhagic necrosis + DIC                                                                                 |
| Ctrl15 | 68      | M   | Definite AD - slowly progressive dementia                                                                                            |
| Ctrl16 | 49      | F   | Cryptogenic cirrhosis & hepatitis. Hepatic encephalopathy                                                                            |
| Ctrl17 | 50      | M   | Multi-organ failure secondary to ischaemic cardiomyopathy. Neuro-histopathology revealed upon postmortem investigation               |
| Ctrl18 | 76      | M   | Ventricular fibrillation secondary to E-Coli septicaemia. Neuro-histopathology revealed upon postmortem investigation                |
| Ctrl19 | 63      | F   | Widely metastatic ovarian adenocarcinoma stage IIIc. Neuro-histopathology revealed upon postmortem investigation                     |
| Ctrl20 | 74      | M   | Progressive supranuclear palsey-like Tauopathy                                                                                       |
| Ctrl21 | N/A     | N/A | Meningioma                                                                                                                           |
| MS1    | 43      | M   | Severe chronic active & inactive MS                                                                                                  |
| MS2    | 74      | M   | Moderately severe chronic inactive MS                                                                                                |
| MS3    | 79      | F   | Chronic inactive MS. Arteriosclerosis                                                                                                |
| MS4    | 52      | F   | Chronic inactive MS                                                                                                                  |
| MS5    | 48      | M   | Moderately severe chronic active MS                                                                                                  |
| MS6    | 69      | F   | Chronic inactive MS                                                                                                                  |
| MS7    | 74      | F   | Chronic inactive MS                                                                                                                  |
| MS8    | 48      | M   | Subacute MS: involving cervical spinal cord                                                                                          |
| MS9    | 57      | M   | Chronic inactive MS                                                                                                                  |
| MS10   | 50      | M   | Chronic active SPMS                                                                                                                  |
| MS11   | 68      | F   | Moderately severe chronic inactive MS                                                                                                |
| MS12   | 61      | F   | Mild chronic inactive                                                                                                                |
| MS13   | 67      | F   | Moderately severe chronic inactive MS. >20-year course                                                                               |
| MS14   | 80      | M   | Severe chronic inactive MS: affecting spinal cord                                                                                    |
| MS15   | 58      | M   | Chronic active smoldering & chronic inactive                                                                                         |

|             |     |   |                                                                         |
|-------------|-----|---|-------------------------------------------------------------------------|
| <b>MS16</b> | 77  | F | Chronic inactive SPMS: affecting spinal cord                            |
| <b>MS17</b> | 61  | F | Severe chronic inactive MS                                              |
| <b>MS18</b> | 63  | F | Chronic inactive SPMS: severely affecting cervical spinal cord          |
| <b>MS19</b> | 68  | F | Chronic inactive MS                                                     |
| <b>MS20</b> | N/A | F | Multiple active & reactivated MS plaques                                |
| <b>MS21</b> | 81  | F | Moderately severe chronic inactive RRMS                                 |
| <b>MS22</b> | 32  | F | Severe chronic progressive MS                                           |
| <b>MS23</b> | 46  | F | Progressive MS                                                          |
| <b>MS24</b> | 77  | M | Moderately severe chronic inactive MS                                   |
| <b>MS25</b> | 77  | F | Chronic inactive MS coexisted with AD                                   |
| <b>MS26</b> | 78  | F | Moderately severe chronic inactive MS (38-year course)                  |
| <b>MS27</b> | N/A | M | Moderately severe chronic active MS (30-year course) COD: PE            |
| <b>MS28</b> | 41  | F | Chronic inactive MS                                                     |
| <b>MS29</b> | 50  | M | Chronic inactive MS                                                     |
| <b>MS30</b> | 70  | F | Chronic inactive MS                                                     |
| <b>MS31</b> | 54  | M | Chronic inactive MS                                                     |
| <b>MS32</b> | 87  | F | Chronic inactive spinal MS. Arteriosclerosis                            |
| <b>MS33</b> | 70  | M | MS (19-year course)                                                     |
| <b>MS34</b> | N/A | M | Moderately severe chronic inactive MS. Arteriosclerosis, cranial bleed  |
| <b>MS35</b> | 52  | M | Moderately severe chronic inactive MS                                   |
| <b>MS36</b> | 67  | F | Progressive MS                                                          |
| <b>MS37</b> | 54  | F | Severe chronic inactive MS (25-year course)                             |
| <b>MS38</b> | 69  | F | Chronic inactive MS                                                     |
| <b>MS39</b> | 75  | F | Chronic inactive MS: affecting spinal cord. COD: respiratory failure    |
| <b>MS40</b> | 58  | F | Chronic inactive MS (20-year course). Atherosclerosis, arteriosclerosis |
| <b>MS41</b> | 60  | F | Chronic inactive MS                                                     |
| <b>MS42</b> | 53  | F | Moderately severe chronic inactive MS                                   |
| <b>MS43</b> | 50  | F | Moderately severe chronic inactive MS                                   |
| <b>MS44</b> | 65  | F | Very minimal demyelinating MS plaque burden                             |
| <b>MS45</b> | 92  | F | Moderate chronic inactive MS. Arteriosclerosis                          |
| <b>MS46</b> | 59  | M | Moderately severe chronic inactive MS. Atherosclerosis                  |
| <b>MS47</b> | 59  | M | MS- no further information available                                    |
| <b>MS48</b> | 43  | M | Chronic inactive with chronic active smoldering MS                      |
| <b>MS49</b> | 59  | M | Chronic inactive MS                                                     |
| <b>MS50</b> | 53  | F | MS- no further information available                                    |
| <b>MS51</b> | 56  | F | Severe chronic inactive PPMS, (40-year course). Idiopathic Parkinsonism |
| <b>MS52</b> | 29  | F | MS- no further information available                                    |
| <b>MS53</b> | 76  | F | MS- no further information available                                    |
| <b>MS54</b> | 42  | M | MS- no further information available                                    |
| <b>MS55</b> | 67  | M | MS- no further information available                                    |
| <b>MS56</b> | 65  | F | MS- no further information available                                    |
| <b>MS57</b> | 42  | M | MS- no further information available                                    |
| <b>MS58</b> | 98  | M | MS- no further information available                                    |
| <b>MS59</b> | 77  | F | MS- no further information available                                    |
| <b>MS60</b> | 79  | M | MS- no further information available                                    |
| <b>MS61</b> | 66  | M | MS- no further information available                                    |
| <b>MS62</b> | 70  | F | MS- no further information available                                    |
| <b>MS63</b> | 32  | F | Chronic inactive noninflammatory RRMS                                   |
| <b>MS64</b> | N/A | F | MS- no further information available                                    |
| <b>MS65</b> | 60  | F | MS- no further information available                                    |
| <b>MS66</b> | 57  | F | Chronic active MS                                                       |
| <b>MS67</b> | 70  | M | MS- no further information available                                    |
| <b>MS68</b> | 56  | F | MS- no further information available                                    |

|              |     |   |                                                            |
|--------------|-----|---|------------------------------------------------------------|
| <b>MS69</b>  | 75  | F | MS- no further information available                       |
| <b>MS70</b>  | 71  | F | MS- no further information available                       |
| <b>MS71</b>  | 45  | M | Severe spinal mixed chronic inactive & active MS (10-year) |
| <b>MS72</b>  | 57  | F | MS- no further information available                       |
| <b>MS73</b>  | 66  | F | MS- no further information available                       |
| <b>MS74</b>  | 75  | M | MS- no further information available                       |
| <b>MS75</b>  | 59  | M | Moderately severe chronic active MS                        |
| <b>MS76</b>  | 60  | F | MS- no further information available                       |
| <b>MS77</b>  | 61  | F | MS- no further information available                       |
| <b>MS78</b>  | 65  | F | MS- no further information available                       |
| <b>MS79</b>  | 61  | F | Severe chronic active smoldering MS                        |
| <b>MS80</b>  | 84  | F | MS- no further information available                       |
| <b>MS81</b>  | 71  | F | MS- no further information available                       |
| <b>MS82</b>  | 71  | F | MS- no further information available                       |
| <b>MS83</b>  | 61  | M | MS- no further information available                       |
| <b>MS84</b>  | 62  | M | MS- no further information available                       |
| <b>MS85</b>  | 63  | F | Chronic inactive SPMS                                      |
| <b>MS86</b>  | 74  | F | Chronic inactive MS                                        |
| <b>MS87</b>  | 65  | F | MS- no further information available                       |
| <b>MS88</b>  | 89  | F | MS- no further information available                       |
| <b>MS89</b>  | 70  | M | MS- no further information available                       |
| <b>MS90</b>  | 46  | F | MS- no further information available                       |
| <b>MS91</b>  | 59  | F | MS- no further information available                       |
| <b>MS92</b>  | 69  | F | MS- no further information available                       |
| <b>MS93</b>  | 70  | F | MS- no further information available                       |
| <b>MS94</b>  | N/A | F | MS- no further information available                       |
| <b>MS95</b>  | 64  | F | MS- no further information available                       |
| <b>MS96</b>  | 60  | F | MS- no further information available                       |
| <b>MS97</b>  | 56  | M | MS- no further information available                       |
| <b>MS98</b>  | 67  | F | MS- no further information available                       |
| <b>MS99</b>  | 67  | F | MS- no further information available                       |
| <b>MS100</b> | 74  | F | Chronic inactive SPMS with superimposed relapses           |
| <b>MS101</b> | 77  | F | MS- no further information available                       |
