# Supplementary material for: Epstein-Barr virus is present in the brain of most cases of multiple sclerosis and may engage more than just B cells
Source: PubMed Central journal article supplement (PMC5796799; doi:10.1371/journal.pone.0192109), 2018-02-02

**S1 Fig. EBER-ISH staining in the case with the highest viral load as determined by qPCR.** Numerous EBER-positive cells can be seen scattered in the section using antisense probe (A), but not with sense probe (negative control) (B).

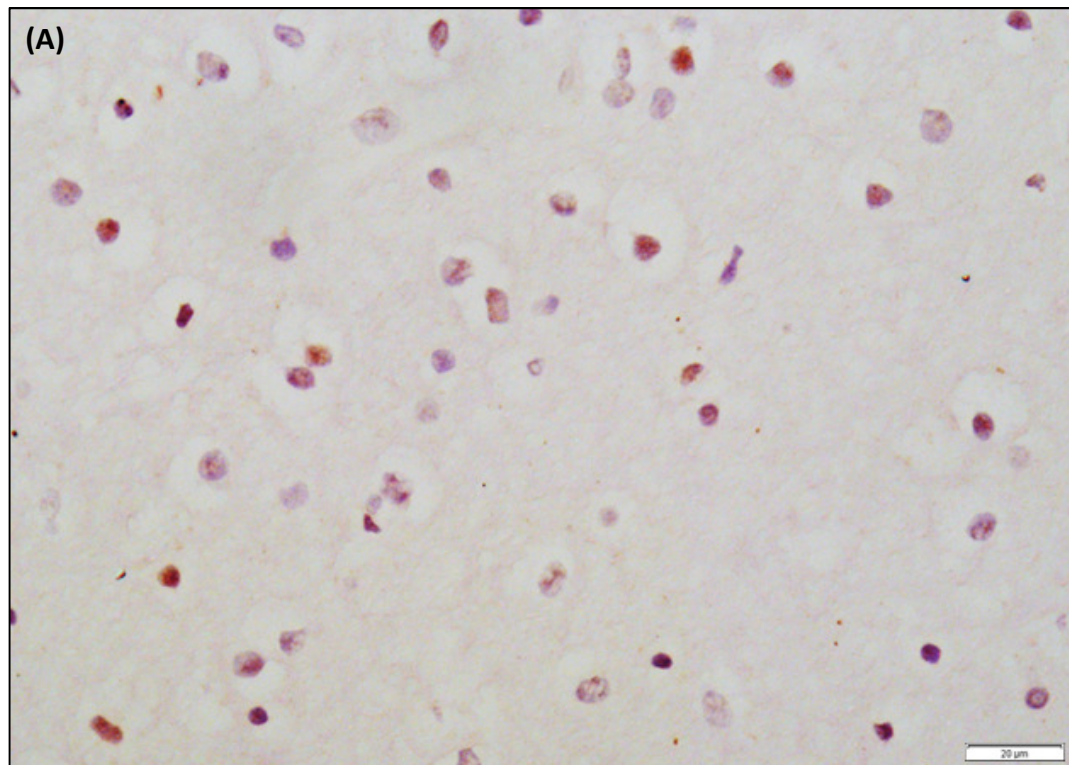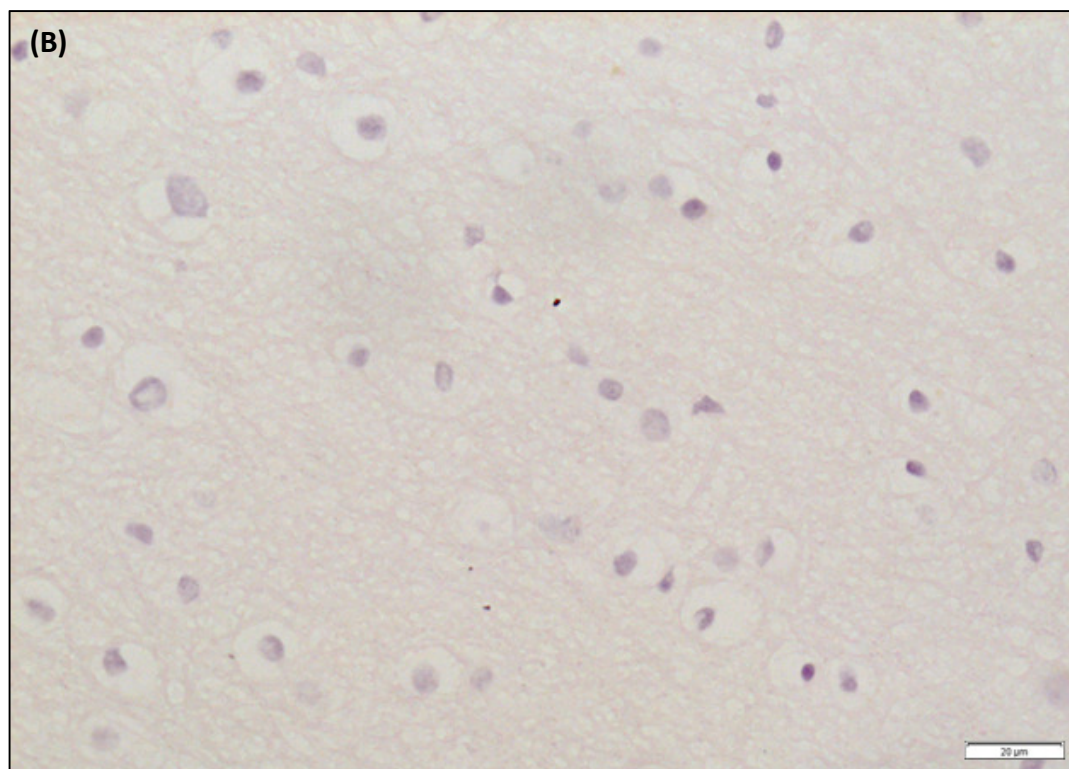

Supplement: pone.0192109.s004.pdf [file pone.0192109.s004.pdf]
