# Supplementary material for: Epstein-Barr virus is present in the brain of most cases of multiple sclerosis and may engage more than just B cells
Source: PubMed Central journal article supplement (PMC5796799; doi:10.1371/journal.pone.0192109), 2018-02-02

**S2 Fig. BZLF1 immunohistochemistry in 2 separate cases of MS brains.**  
Occasional, but very clearly positive cells were seen scattered in the section.

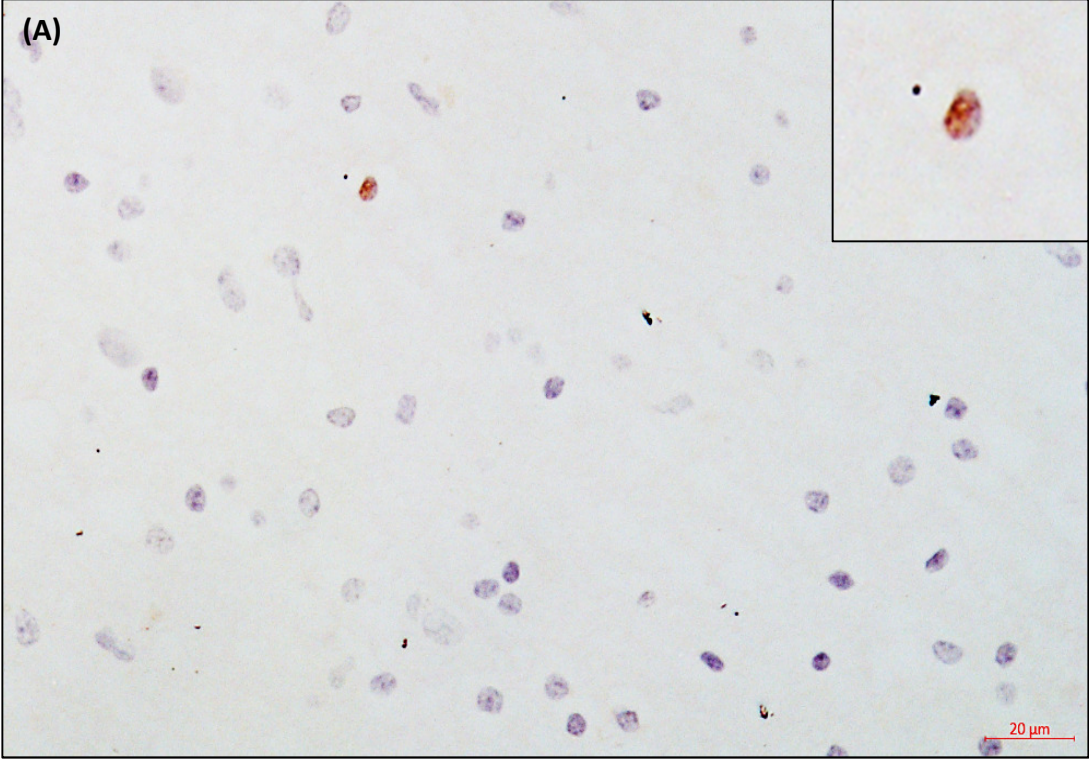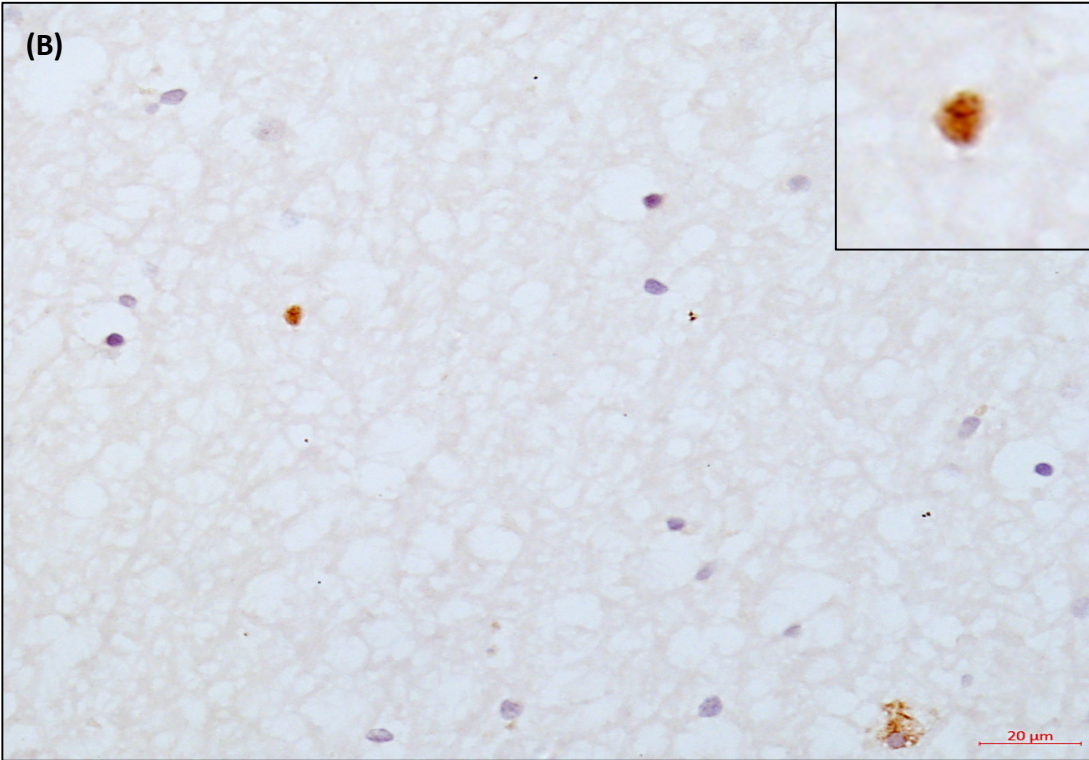

Supplement: pone.0192109.s005.pdf [file pone.0192109.s005.pdf]
