# Supplementary material for: Epstein-Barr virus is present in the brain of most cases of multiple sclerosis and may engage more than just B cells
Source: PubMed Central journal article supplement (PMC5796799; doi:10.1371/journal.pone.0192109), 2018-02-02

**S3 Fig. Immunohistochemistry staining for CD20.** (A) IM tonsil and (B&C) MS brain. In contrast to IM, in MS brain, CD20 positive B-cells were limited in number and often seen in clusters.

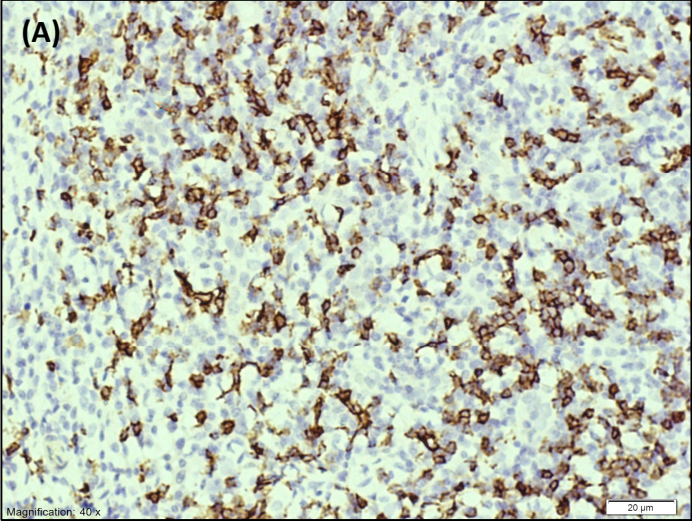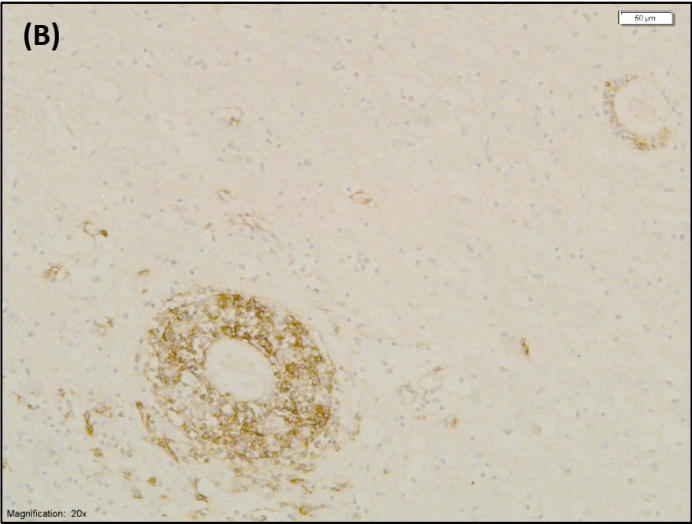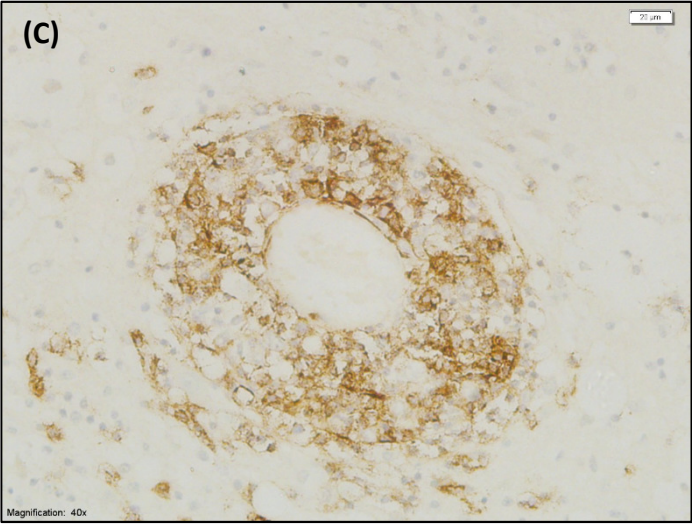

Supplement: pone.0192109.s006.pdf [file pone.0192109.s006.pdf]
